# Supplementary material for: “E Pluribus Unum”: Prospective acceptability benchmarking from the Contouring Collaborative for Consensus in Radiation Oncology (C3RO) Crowdsourced Initiative for Multi-Observer Segmentation
Source: bioRxiv or medRxiv preprint supplement (doi:10.1101/2022.09.23.22280295), 2022-09-27
Supplement: Supplementary file [file media-1.pdf]

# C3RO Intake Survey

|                                                                                                   |                                                                                                                                                                                                                                                                                                                            |
|---------------------------------------------------------------------------------------------------|----------------------------------------------------------------------------------------------------------------------------------------------------------------------------------------------------------------------------------------------------------------------------------------------------------------------------|
| <b>First name</b>                                                                                 | <input type="text"/>                                                                                                                                                                                                                                                                                                       |
| <b>Last name</b>                                                                                  | <input type="text"/>                                                                                                                                                                                                                                                                                                       |
| <b>Hospital/organization</b>                                                                      | <input type="text"/>                                                                                                                                                                                                                                                                                                       |
| <b>Country</b>                                                                                    | <input type="text" value="▼"/>                                                                                                                                                                                                                                                                                             |
| <b>Email address (for gift card raffle)</b>                                                       | <input type="text"/>                                                                                                                                                                                                                                                                                                       |
| <b>Why are you interested in participating in this challenge?</b><br><i>Select all that apply</i> | <input type="checkbox"/> Opportunity to win gift cards<br><input type="checkbox"/> Comparison to peers/leaderboard<br><input type="checkbox"/> Access to educational content<br><input type="checkbox"/> Access to contour datasets for guideline/research purposes                                                        |
| <b>How did you first hear about this challenge?</b><br><i>Select all that apply</i>               | <input type="radio"/> Twitter<br><input type="radio"/> eContour website announcement<br><input type="radio"/> Email from eContour or ProKnow<br><input type="radio"/> Colleague (word of mouth)<br><input type="radio"/> ROECSG newsletter<br><input type="radio"/> ROECSG annual symposium<br><input type="radio"/> Other |
| <b>What is your profession?</b>                                                                   | <input type="radio"/> Radiation Oncologist/Clinical Oncologist<br><input type="radio"/> Resident Physician<br><input type="radio"/> Medical Student<br><input type="radio"/> Medical Physicist<br><input type="radio"/> Dosimetrist<br><input type="radio"/> Radiation Therapist<br><input type="radio"/> Other            |
| <b>What year did you start practicing (graduate residency)?</b>                                   | <input type="text"/>                                                                                                                                                                                                                                                                                                       |
| <b>Gender</b>                                                                                     | <input type="text" value="▼"/>                                                                                                                                                                                                                                                                                             |
| <b>Which categories describe you?</b><br><i>Select all that apply</i>                             | <input type="checkbox"/> White<br><input type="checkbox"/> Hispanic, Latino, or Spanish origin<br><input type="checkbox"/> Black or African American<br><input type="checkbox"/> Asian<br><input type="checkbox"/> Other                                                                                                   |
| <b>Do you have an academic affiliation?</b>                                                       | <input checked="" type="radio"/> Yes<br><input type="radio"/> No                                                                                                                                                                                                                                                           |

reset

reset

reset

|                                                                                                                                                                                                                                                               |                                                                                                                                                                                                                                                                                                                                                                                                                                                                                                          |        |
|---------------------------------------------------------------------------------------------------------------------------------------------------------------------------------------------------------------------------------------------------------------|----------------------------------------------------------------------------------------------------------------------------------------------------------------------------------------------------------------------------------------------------------------------------------------------------------------------------------------------------------------------------------------------------------------------------------------------------------------------------------------------------------|--------|
| <b>Which best describes your primary practice?</b>                                                                                                                                                                                                            | <input type="radio"/> Academic/university<br><input type="radio"/> Non-academic hospital<br><input type="radio"/> Private practice (solo or group)<br><input type="radio"/> Other                                                                                                                                                                                                                                                                                                                        | reset  |
| <b>How many radiation oncologist colleagues do you work with at your primary site (excluding you)?</b>                                                                                                                                                        | <input type="text"/>                                                                                                                                                                                                                                                                                                                                                                                                                                                                                     |        |
| <b>On most days you are in clinic, is there another radiation oncologist on site with you?</b>                                                                                                                                                                | <input checked="" type="radio"/> Yes <input type="radio"/> No                                                                                                                                                                                                                                                                                                                                                                                                                                            | reset  |
| <b>Which disease site(s) do you treat?</b><br><i>Select all that apply</i>                                                                                                                                                                                    | <input type="checkbox"/> Breast<br><input type="checkbox"/> CNS<br><input type="checkbox"/> Gastrointestinal<br><input checked="" type="checkbox"/> Genitourinary<br><input type="checkbox"/> Gynecologic<br><input type="checkbox"/> Head & Neck<br><input type="checkbox"/> Lung, Thoracic<br><input type="checkbox"/> Lymphoma, Leukemia<br><input type="checkbox"/> Metastatic<br><input type="checkbox"/> Pediatric<br><input type="checkbox"/> Sarcoma<br><input type="checkbox"/> Skin, Cutaneous |        |
| <b>Approximately how many patients with <u>genitourinary cancer</u> do you treat per month?</b>                                                                                                                                                               | <input type="text"/>                                                                                                                                                                                                                                                                                                                                                                                                                                                                                     |        |
| <b>Do you consider yourself an "expert" in any of the aforementioned disease sites?</b>                                                                                                                                                                       | <input checked="" type="radio"/> Yes<br><input type="radio"/> No                                                                                                                                                                                                                                                                                                                                                                                                                                         | reset  |
| <b>Please list area(s) and years of experience with that area</b>                                                                                                                                                                                             | <input type="text"/>                                                                                                                                                                                                                                                                                                                                                                                                                                                                                     | Expand |
| <b>By submitting this survey, you consent to the use of the de-identified results and responses you provide in aggregate with other participants' results and responses for analysis. Participation in this challenge is voluntary and at no cost to you.</b> | <input type="radio"/> I acknowledge and accept these terms                                                                                                                                                                                                                                                                                                                                                                                                                                               | reset  |
| <input type="button" value="Submit"/><br><input type="button" value="Save &amp; Return Later"/>                                                                                                                                                               |                                                                                                                                                                                                                                                                                                                                                                                                                                                                                                          |        |
