# Supplementary material for: “E Pluribus Unum”: Prospective acceptability benchmarking from the Contouring Collaborative for Consensus in Radiation Oncology (C3RO) Crowdsourced Initiative for Multi-Observer Segmentation
Source: bioRxiv or medRxiv preprint supplement (doi:10.1101/2022.09.23.22280295), 2022-09-27
Supplement: Supplementary file [file media-2.pdf]

## Appendices

## Appendix B. Imaging Characteristics

**Table B1.** Computed tomography (CT) acquisition parameters for C3RO cases.

| CT Acquisition Parameter     | Breast             | Sarcoma            | H&N            | GYN                | GI                 |
|------------------------------|--------------------|--------------------|----------------|--------------------|--------------------|
| Manufacturer                 | GE                 | SIEMENS            | SIEMENS        | GE                 | GE                 |
| Model                        | Discovery CT590 RT | SOMATOM Confidence | Sensation Open | Discovery CT590 RT | Discovery CT590 RT |
| Slice Thickness (mm)         | 2.5                | 3                  | 3              | 2.5                | 2.5                |
| KVP (kV)                     | 120                | 120                | 120            | 120                | 120                |
| Exposure Time (ms)           | 891                | 1000               | 1000           | 856                | 856                |
| X-Ray Tube Current (mA)      | 154                | 111                | 32             | 167                | 277                |
| Rows                         | 512                | 512                | 512            | 512                | 512                |
| Columns                      | 512                | 512                | 512            | 512                | 512                |
| In-plane Resolution (mm)     | 1.26               | 1.26               | 0.98           | 0.98               | 0.98               |
| Reconstruction diameter (mm) | 650                | 650                | 500            | 500                | 500                |
| Number of axial slices       | 140                | 229                | 143            | 195                | 196                |

## Appendix C. Tolerance Values

**Table C1.** Tolerance values used for surface Dice similarity coefficient value computations for each region of interest (ROI).

| Case    | ROI            | Tolerance Value (mm) |
|---------|----------------|----------------------|
| Breast  | BrachialPlex_L | 4.2                  |
|         | CTV_Ax         | 3.4                  |
|         | CTV_Chestwall  | 4.4                  |
|         | CTV_IMN        | 2.7                  |
|         | CTV_Sclav_LN   | 3.6                  |
|         | Heart          | 1.8                  |
|         | A_LAD_L        | 4.6                  |
| Sarcoma | GTV            | 0.4                  |
|         | CTV            | 5.4                  |
|         | Genitals       | 3.2                  |
| H&N     | GTVp           | 1.4                  |
|         | GTVn           | 0.5                  |
|         | CTV1           | 1.3                  |
|         | CTV2           | 10.3                 |
|         | Brainstem      | 1.1                  |
|         | GInd_Submand_L | 0.5                  |

|     |                |       |
|-----|----------------|-------|
|     | GInd_Submand_R | 1.0   |
|     | Larynx         | 2.2   |
|     | Musc_Constrict | 2.1   |
|     | Partoid_L      | 0.9   |
|     | Parotid_R      | 0.8   |
| GYN | GTVn           | 0.9   |
|     | CTVn_4500      | 3.0   |
|     | CTVp_4500      | 3.8   |
|     | Bowel_Small    | 5.0   |
| GI  | Bag_Bowel      | 6.12  |
|     | CTV_4500       | 4.09  |
|     | CTV_5400       | 15.22 |



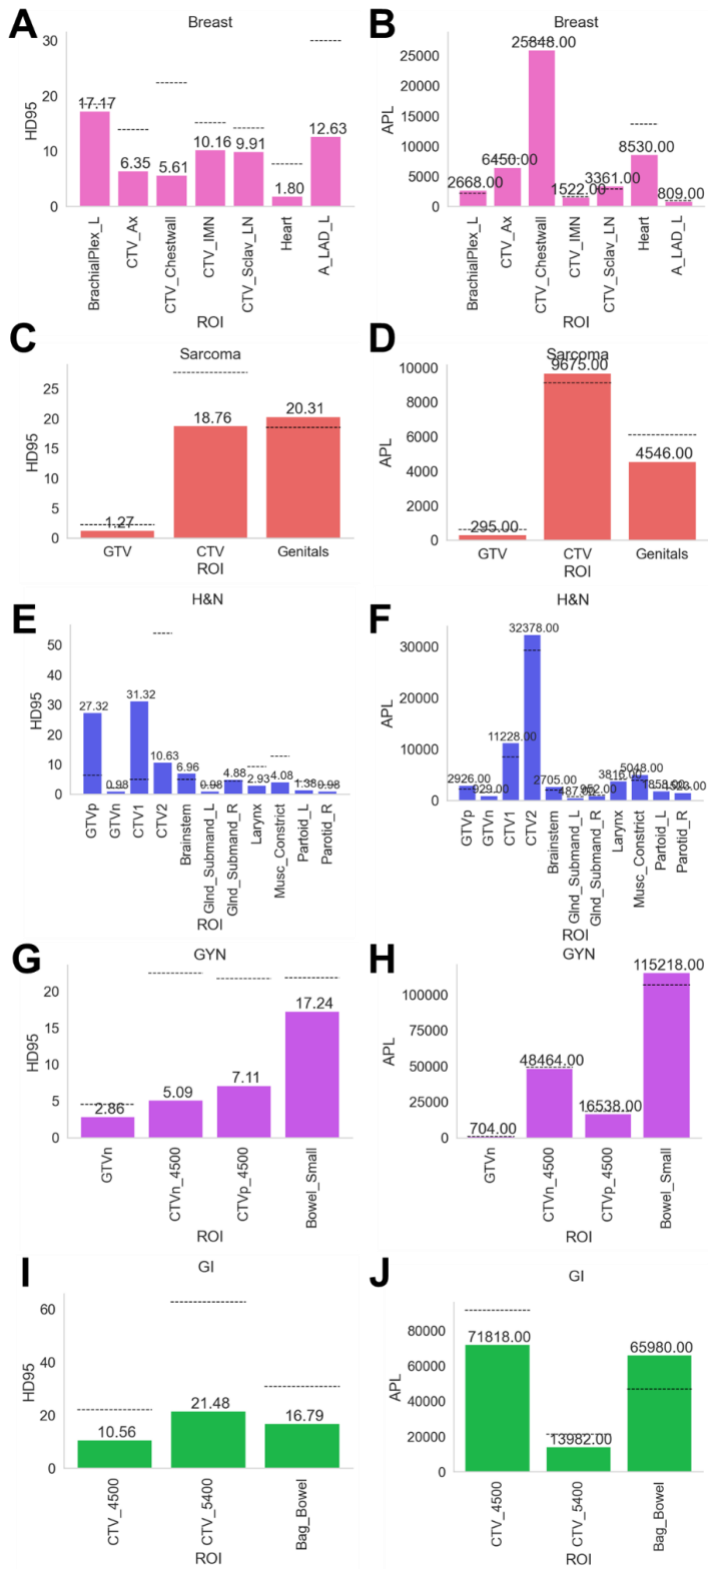

**Figure D2.** Additional metrics comparing non-expert STAPLE using maximum number of available cases to expert STAPLE. 95% Hausdorff distance (HD95) and added path length (APL).

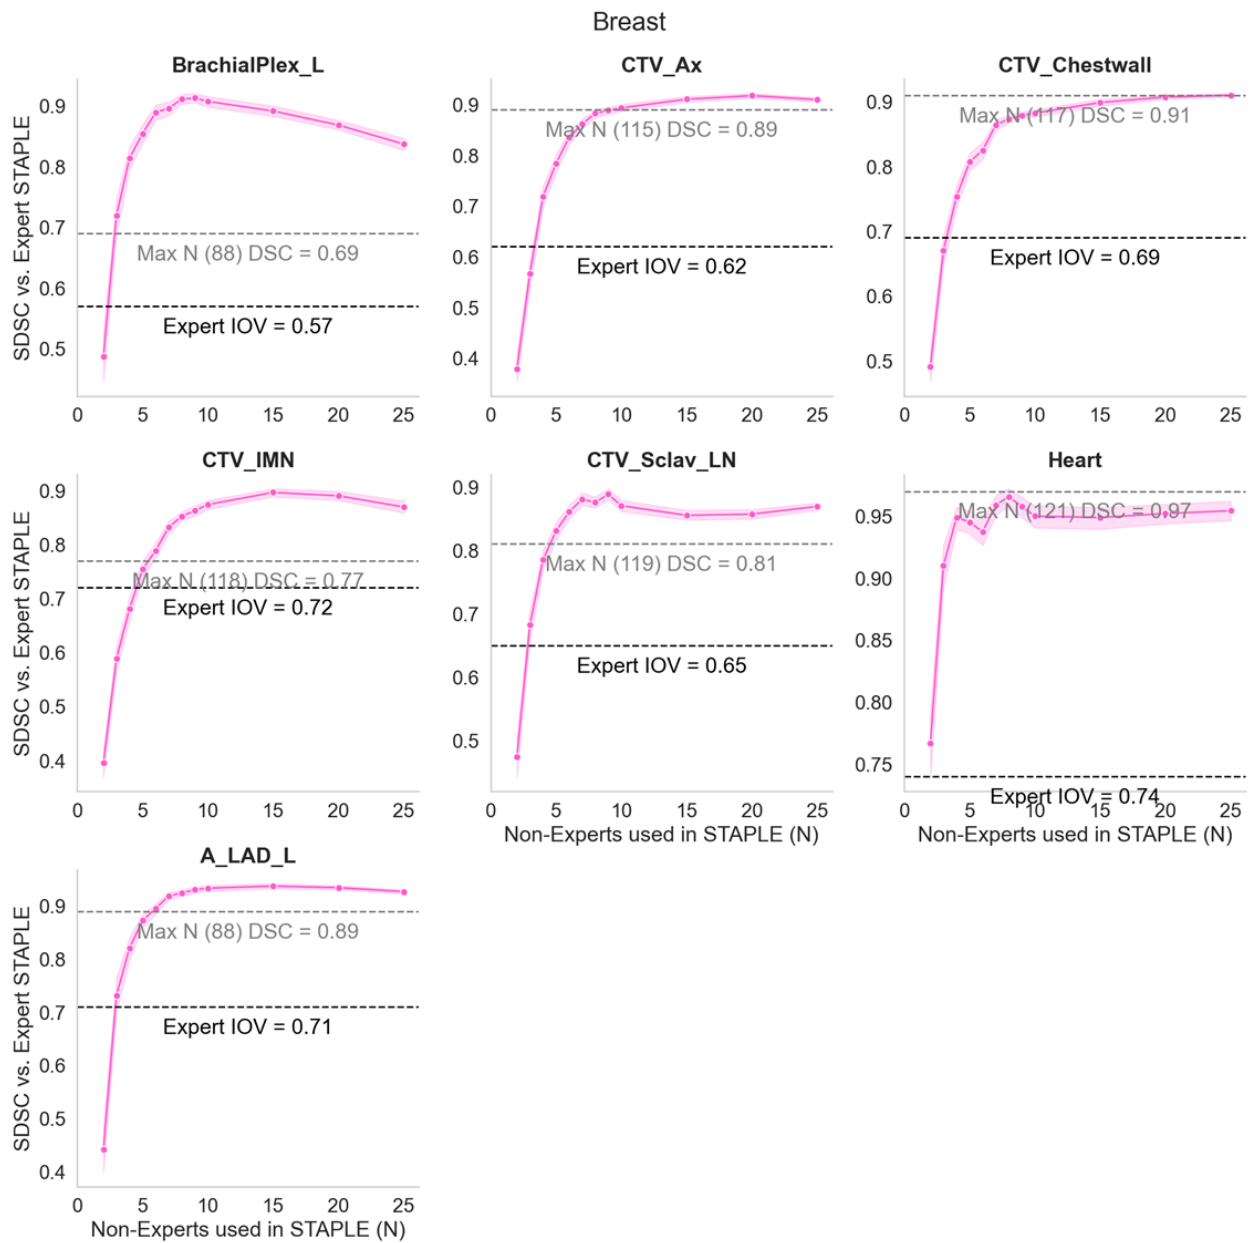

**Figure D3.** Bootstrap experiment results for Breast case using SDSC.

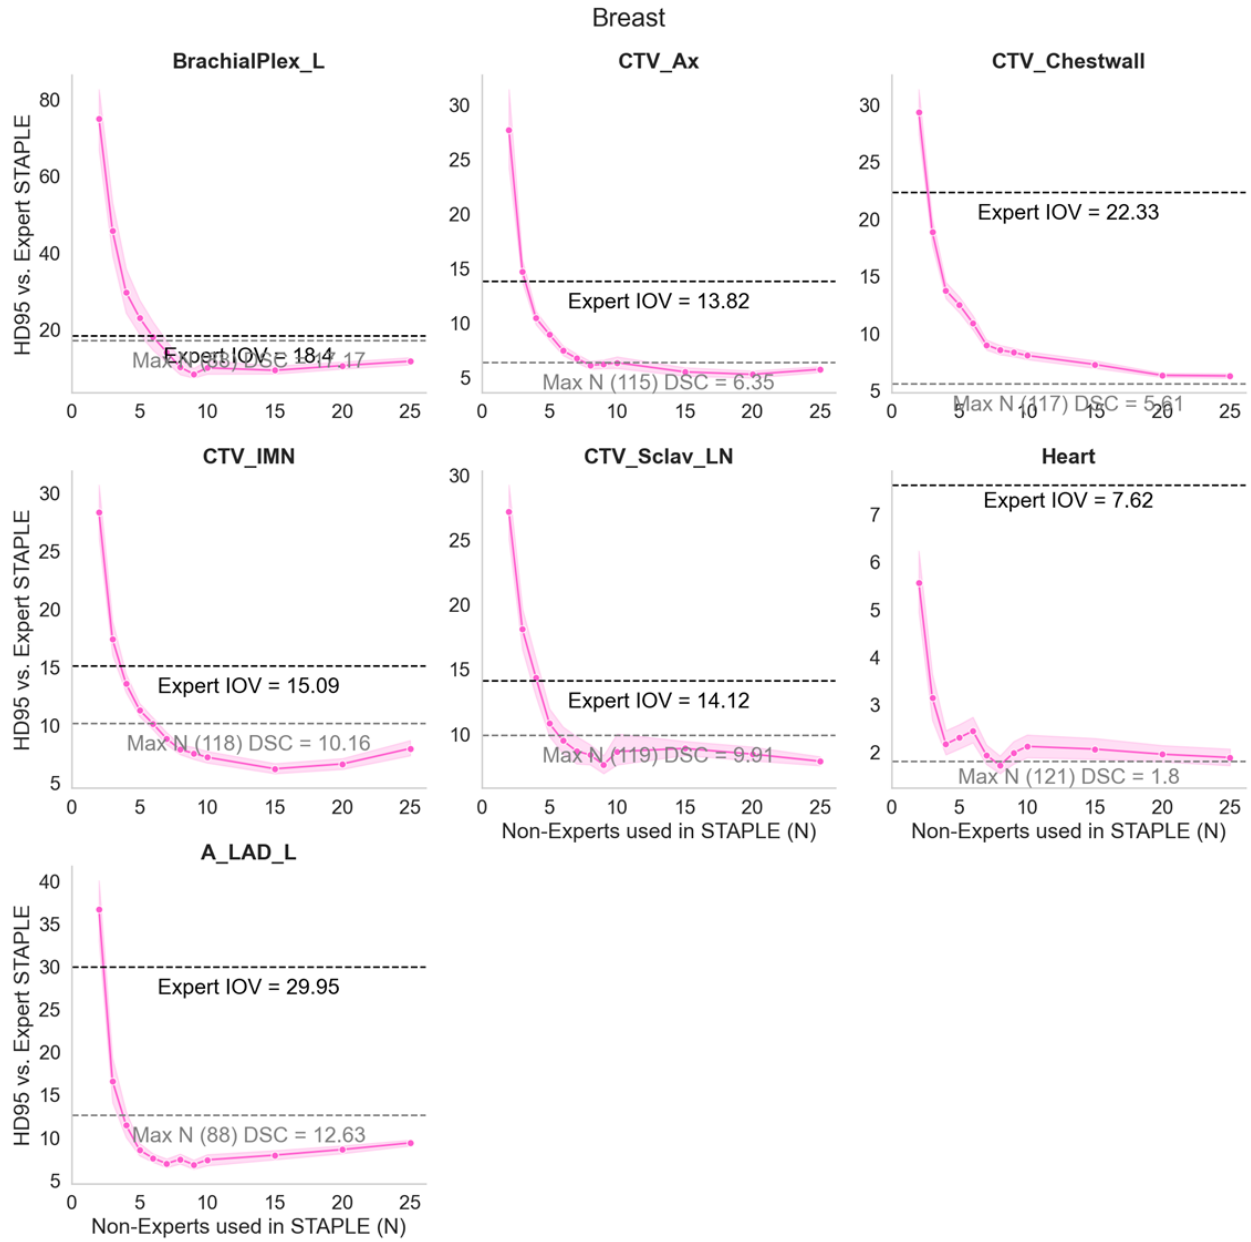

**Figure D4.** Bootstrap experiment results for Breast case using HD95.



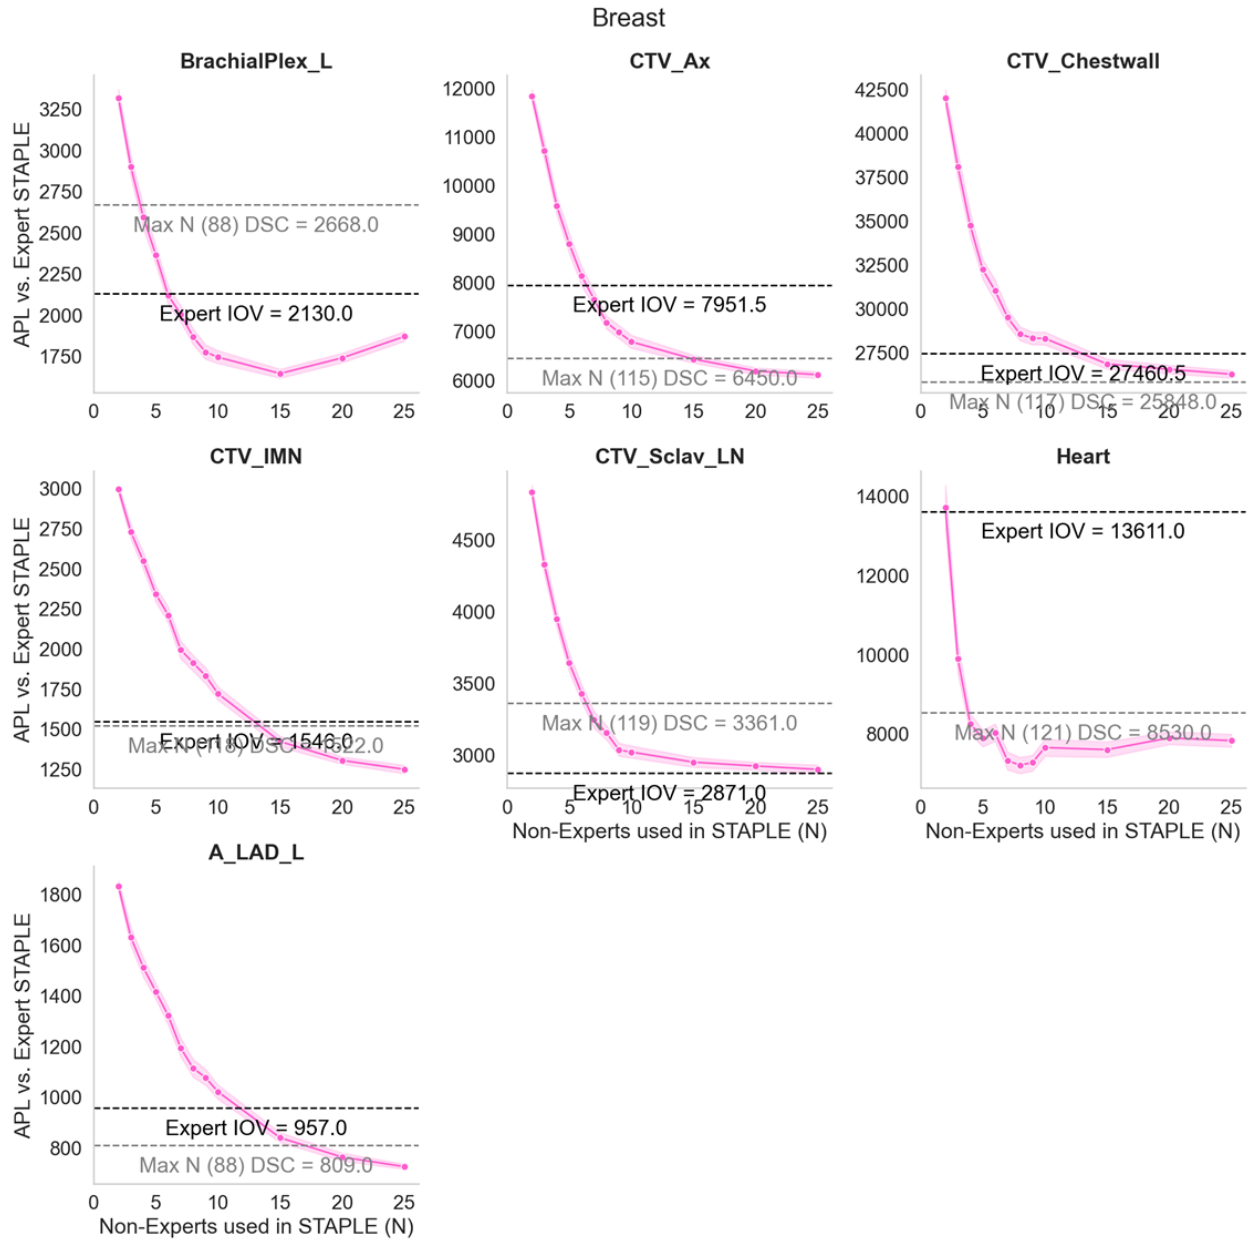

**Figure D5.** Bootstrap experiment results for H&N case using APL.

## Sarcoma

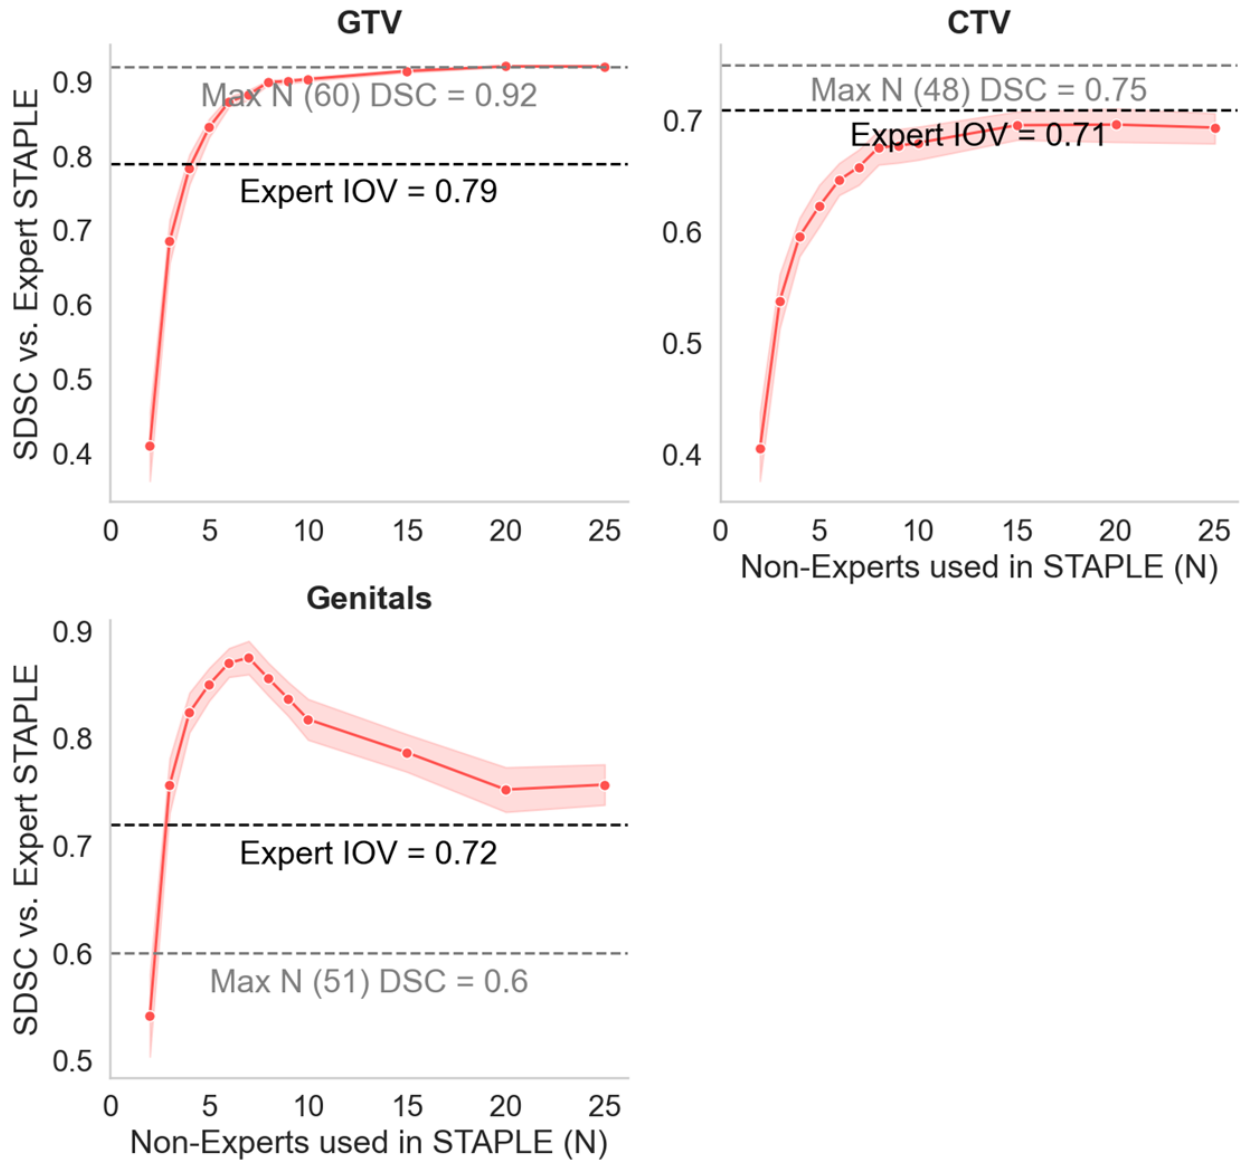

**Figure D6.** Bootstrap experiment results for Sarcoma case using SDSC.

# Sarcoma

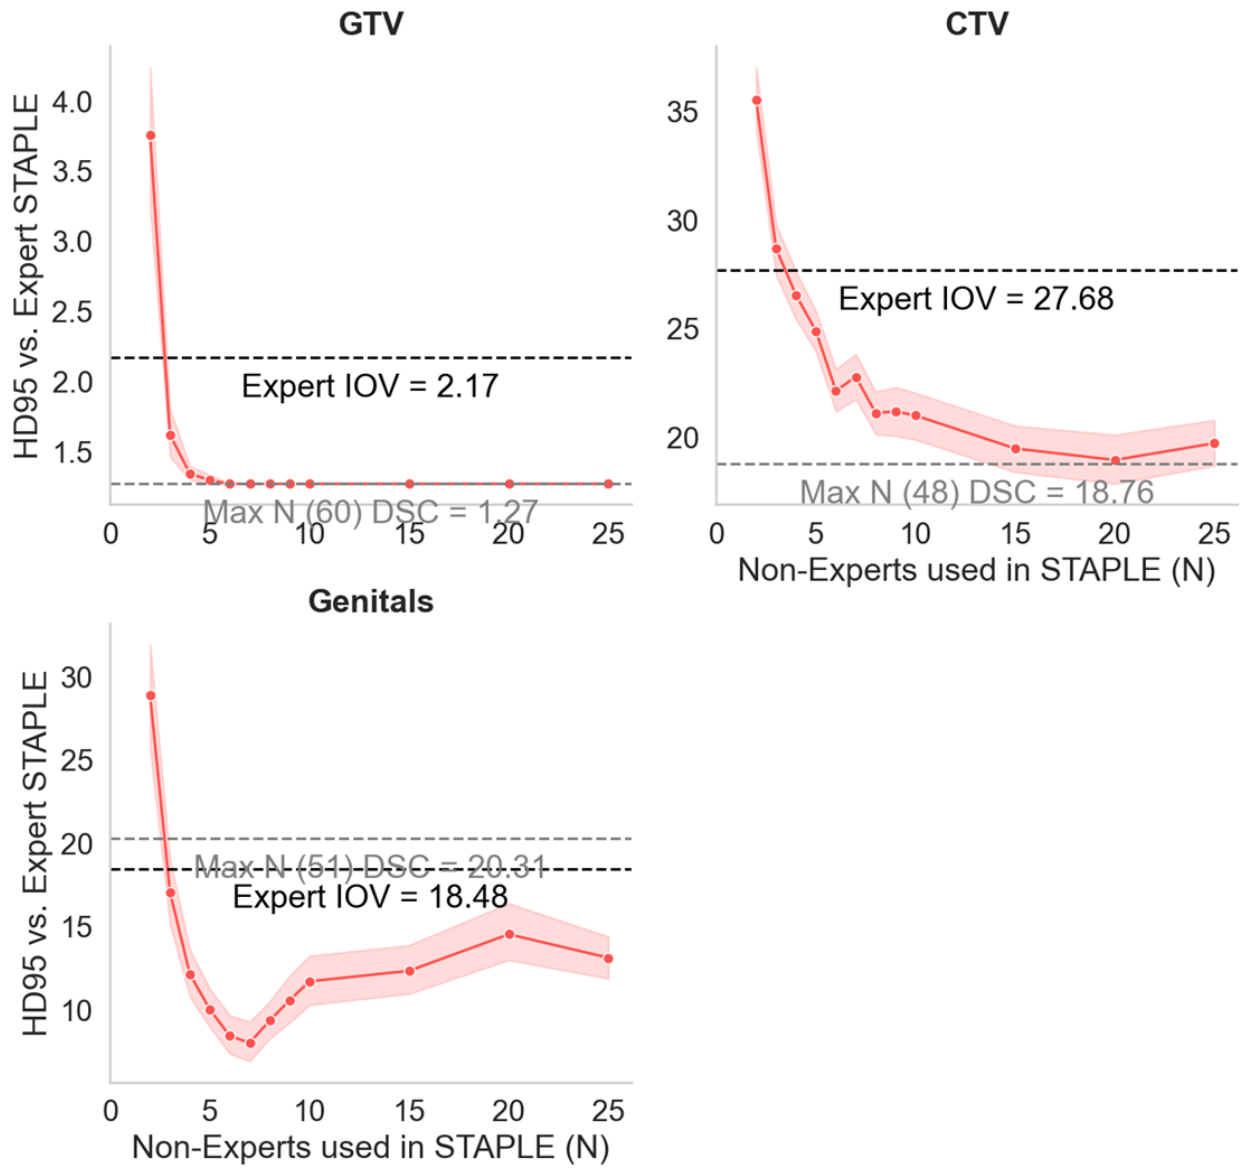

**Figure D7.** Bootstrap experiment results for Sarcoma case using HD95.

## Sarcoma

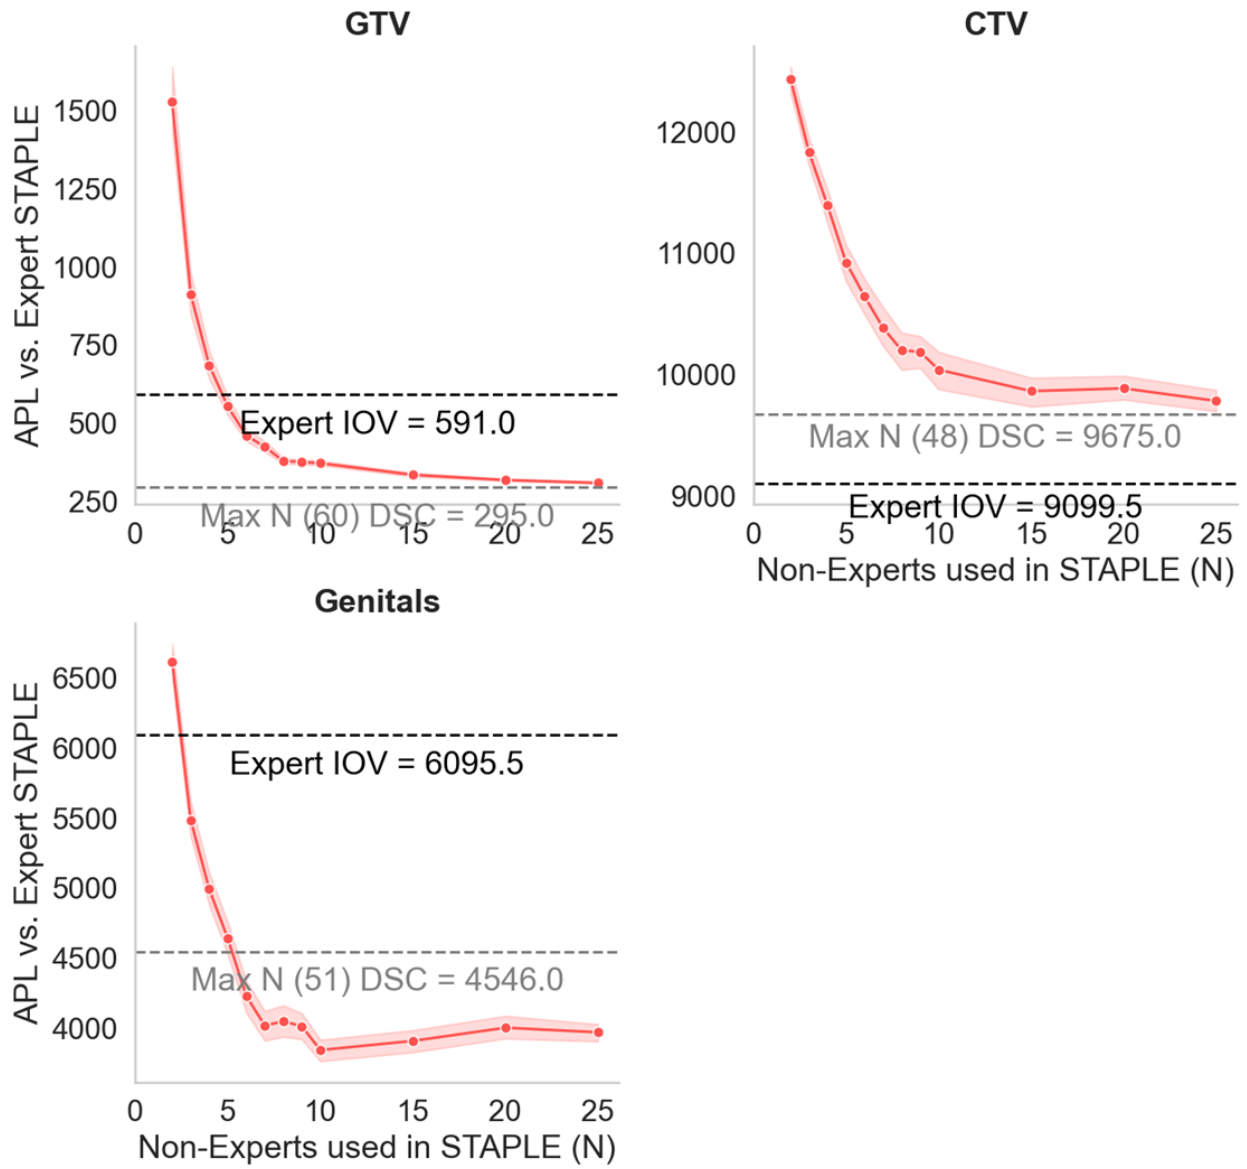

**Figure D8.** Bootstrap experiment results for Sarcoma case using APL.

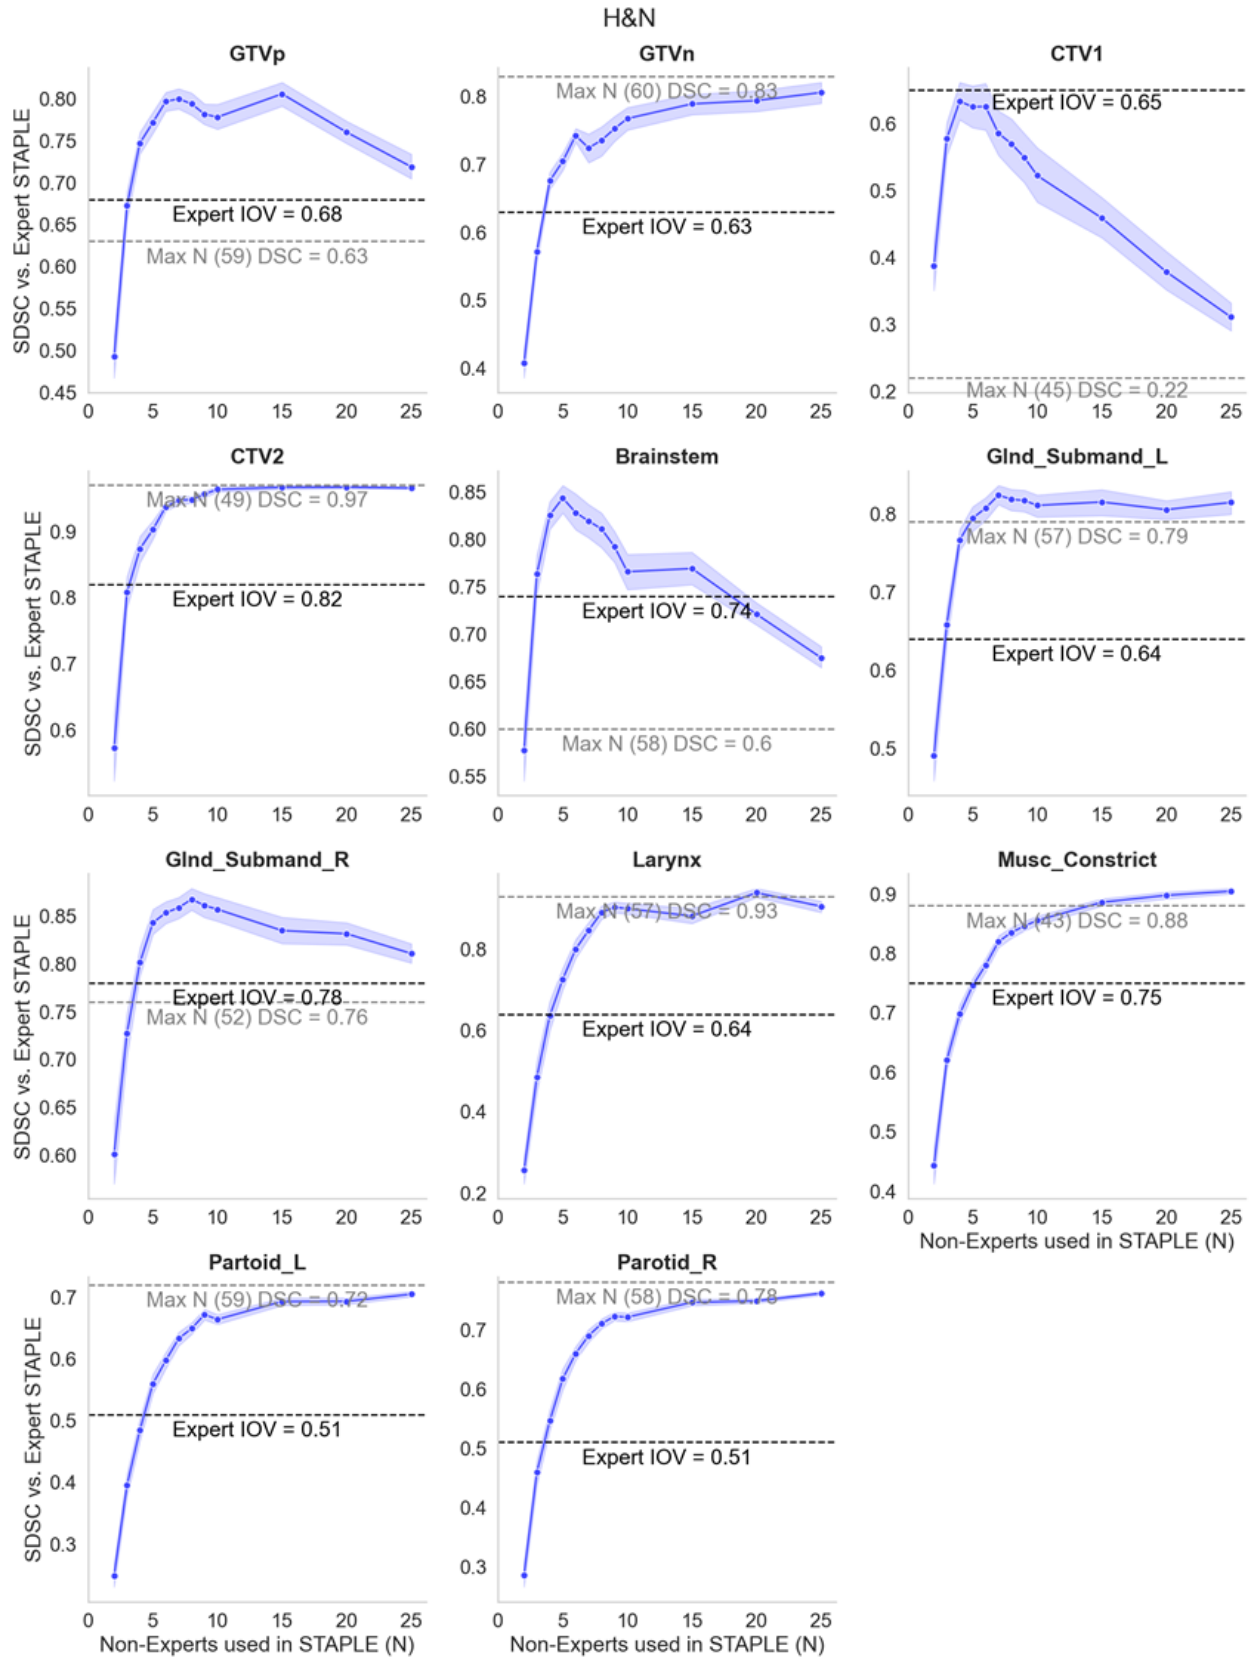

**Figure D9.** Bootstrap experiment results for H&N case using SDSC.

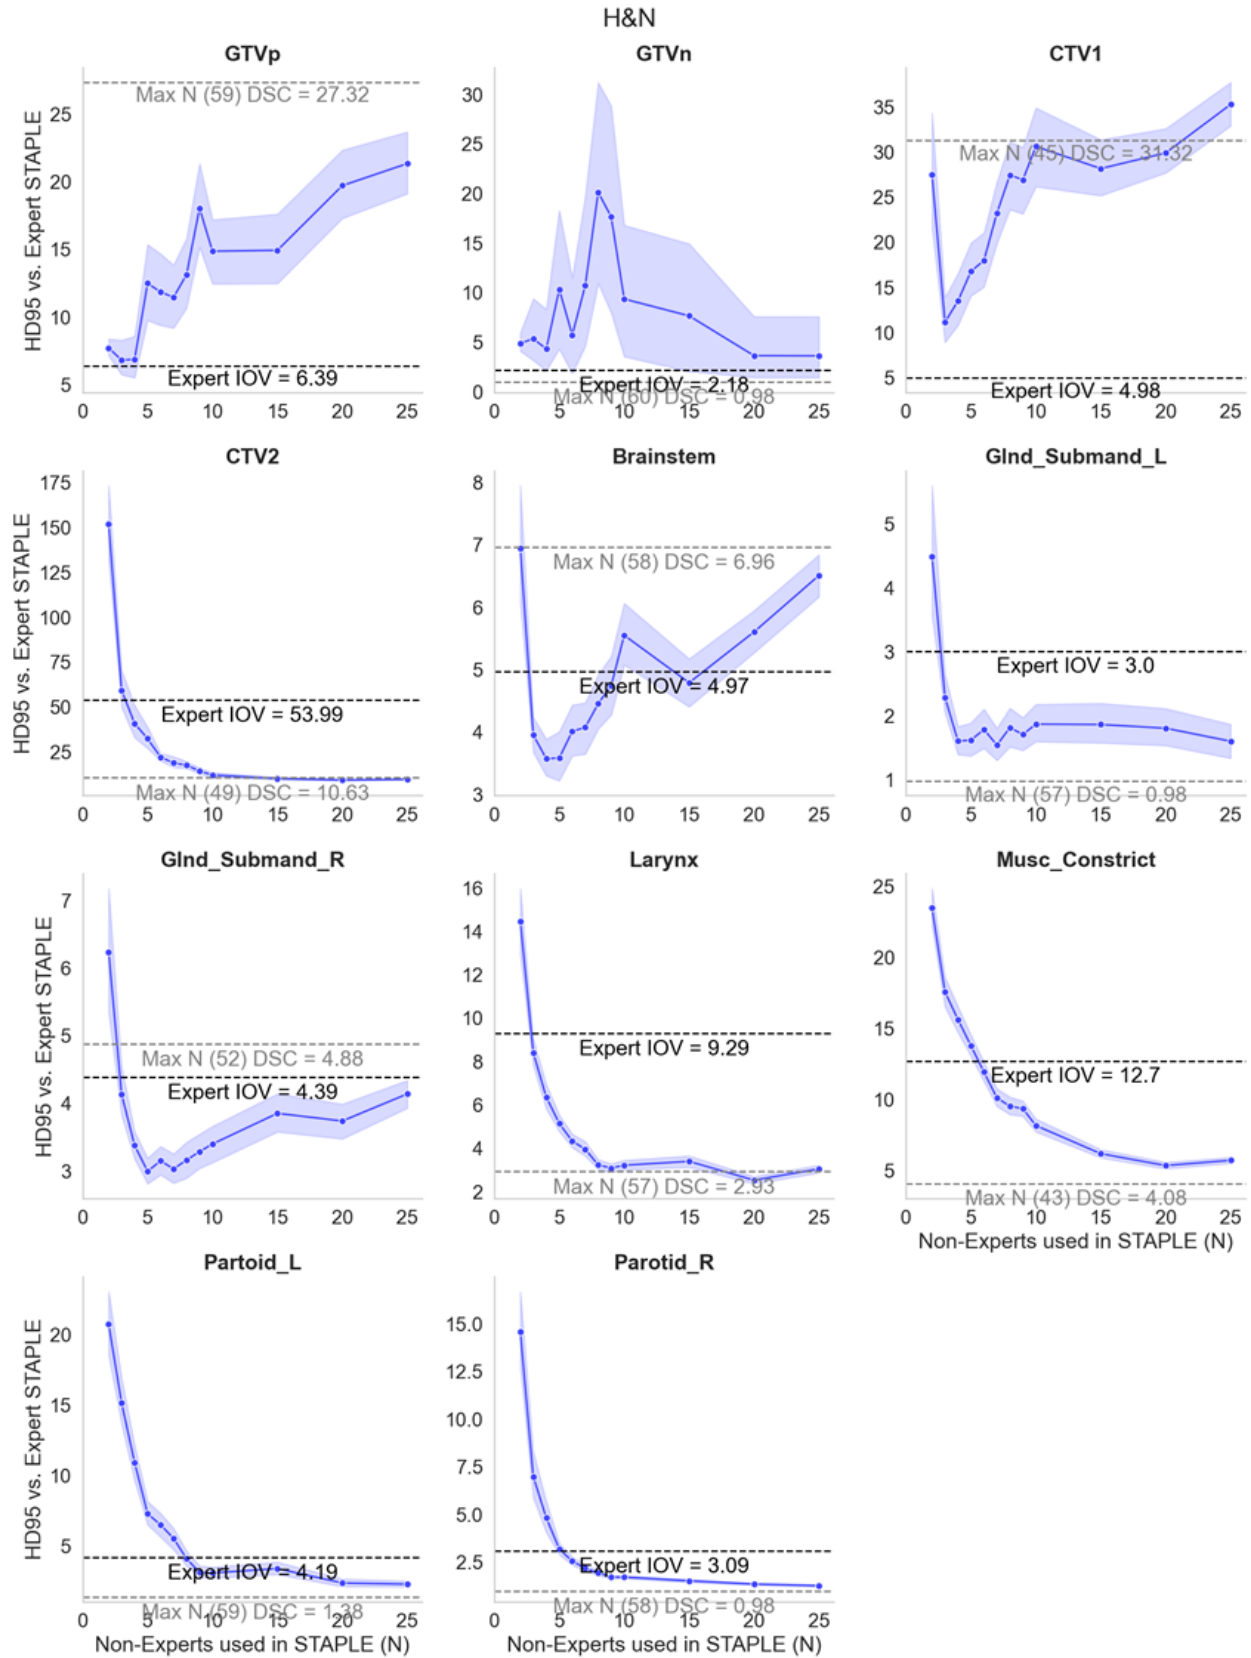

**Figure D10.** Bootstrap experiment results for H&N case using HD95.

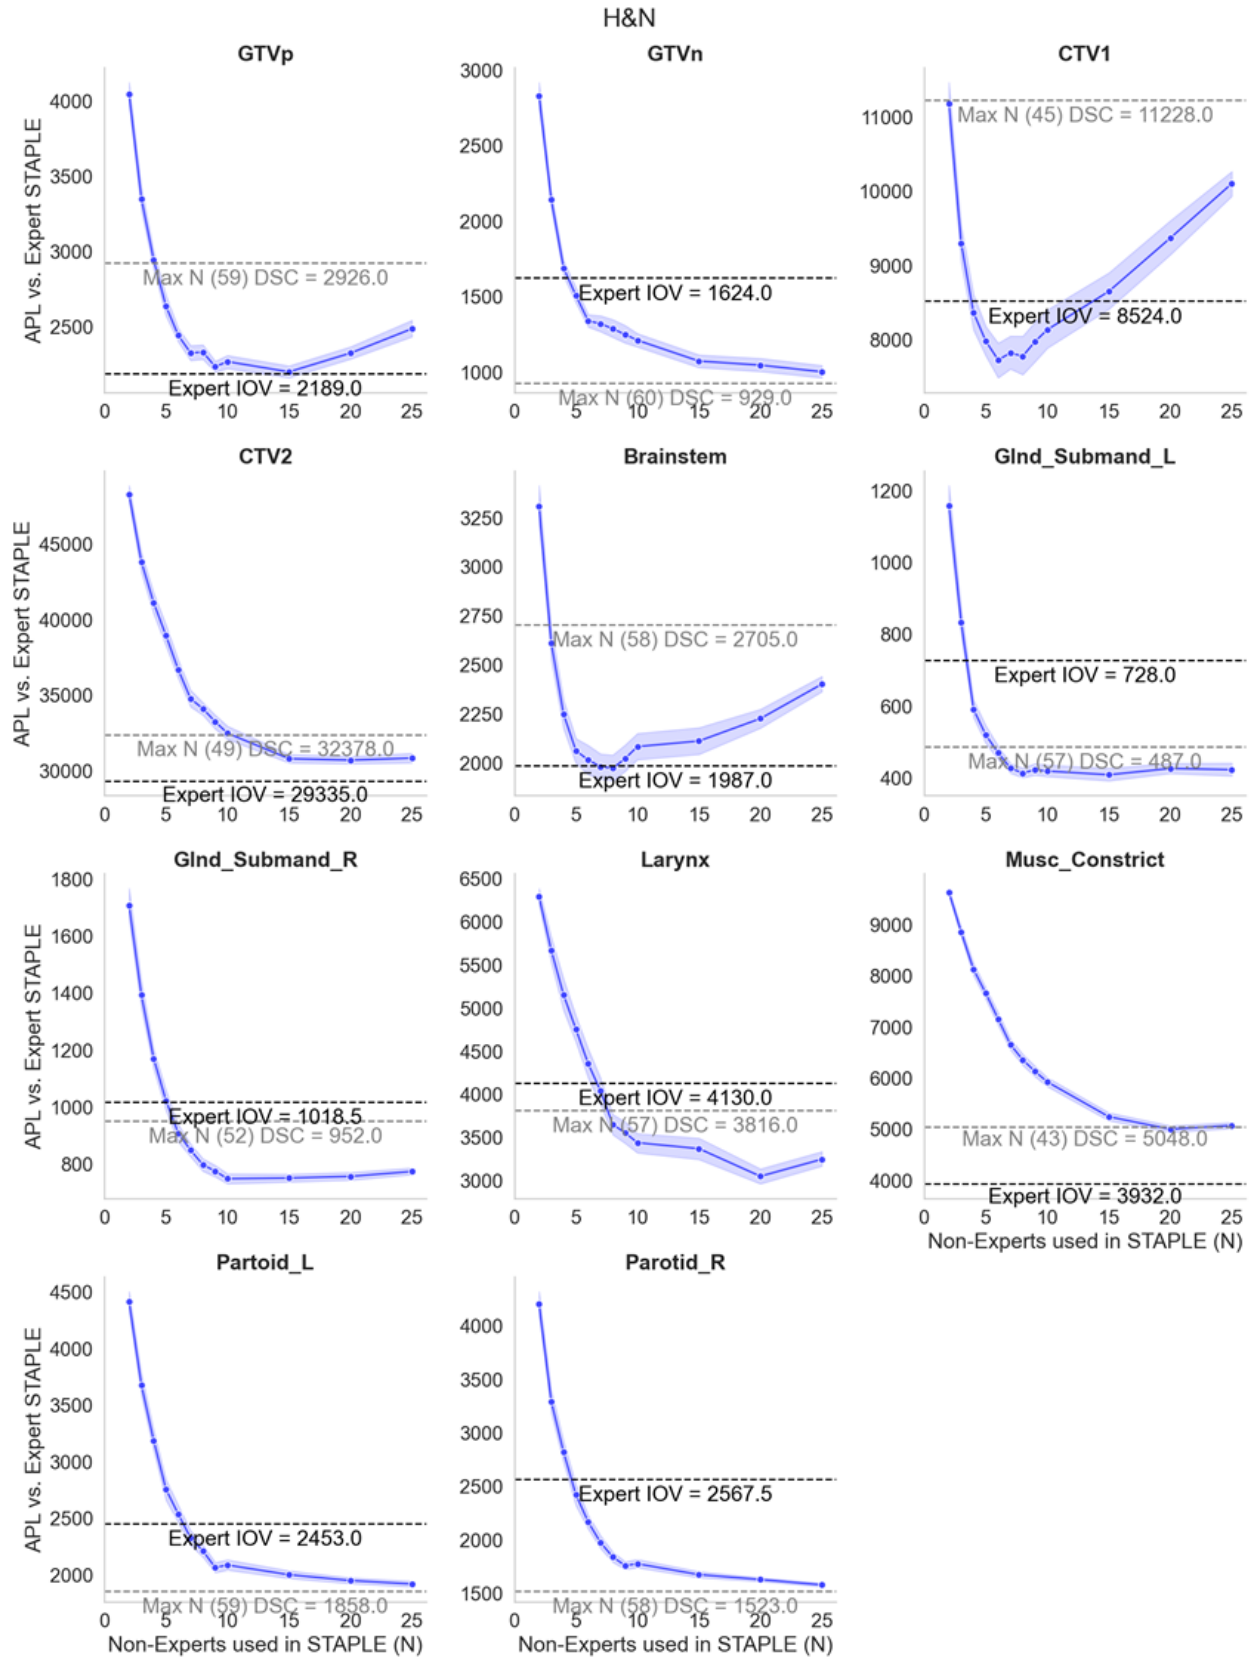

**Figure D11.** Bootstrap experiment results for H&N case using APL.

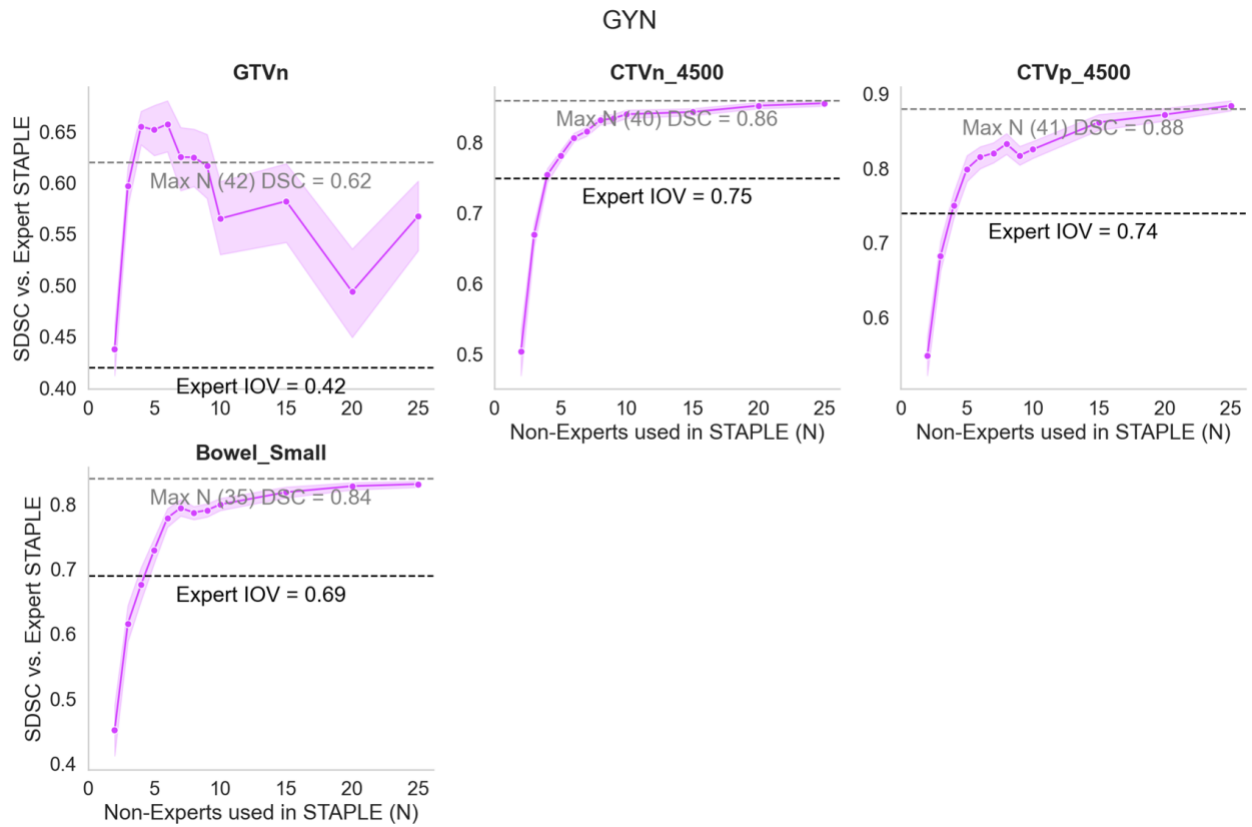

**Figure D12.** Bootstrap experiment results for GYN case using SDSC.



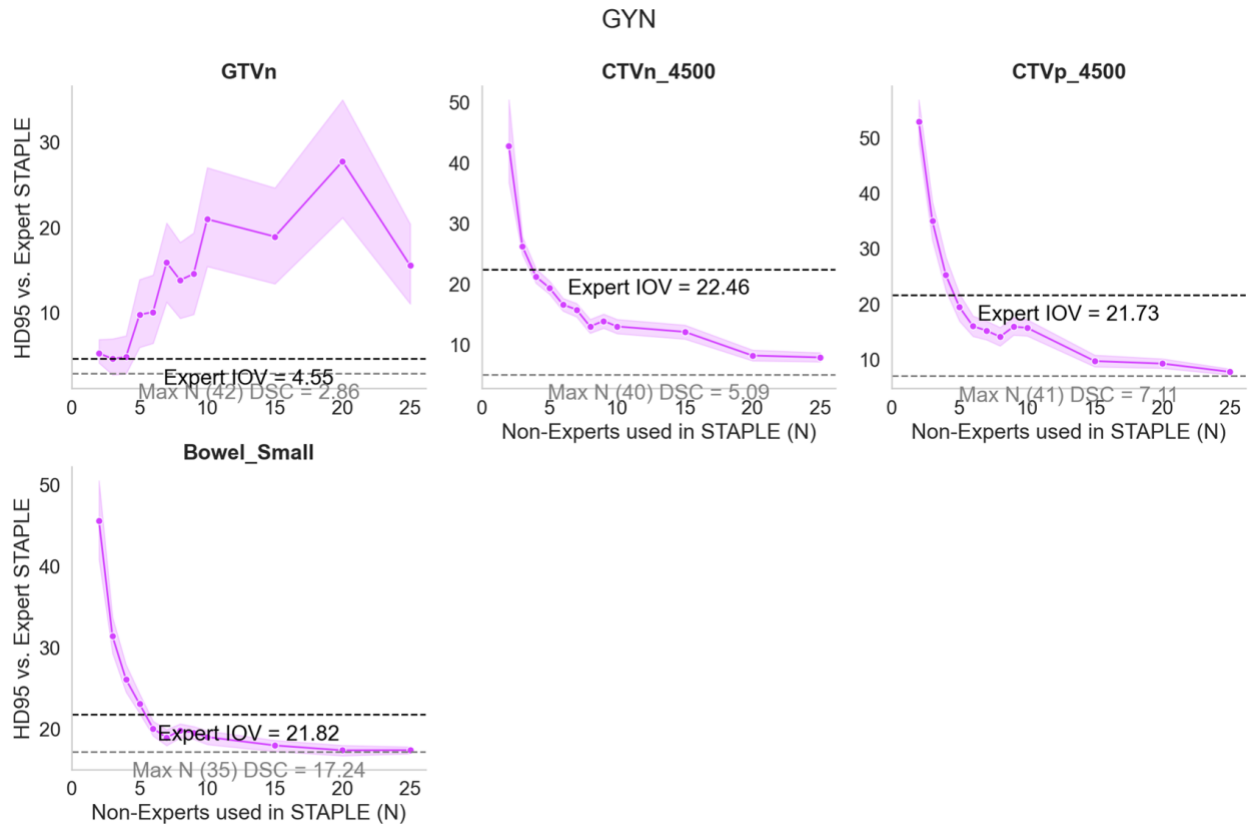

**Figure D13.** Bootstrap experiment results for GYN case using HD95.

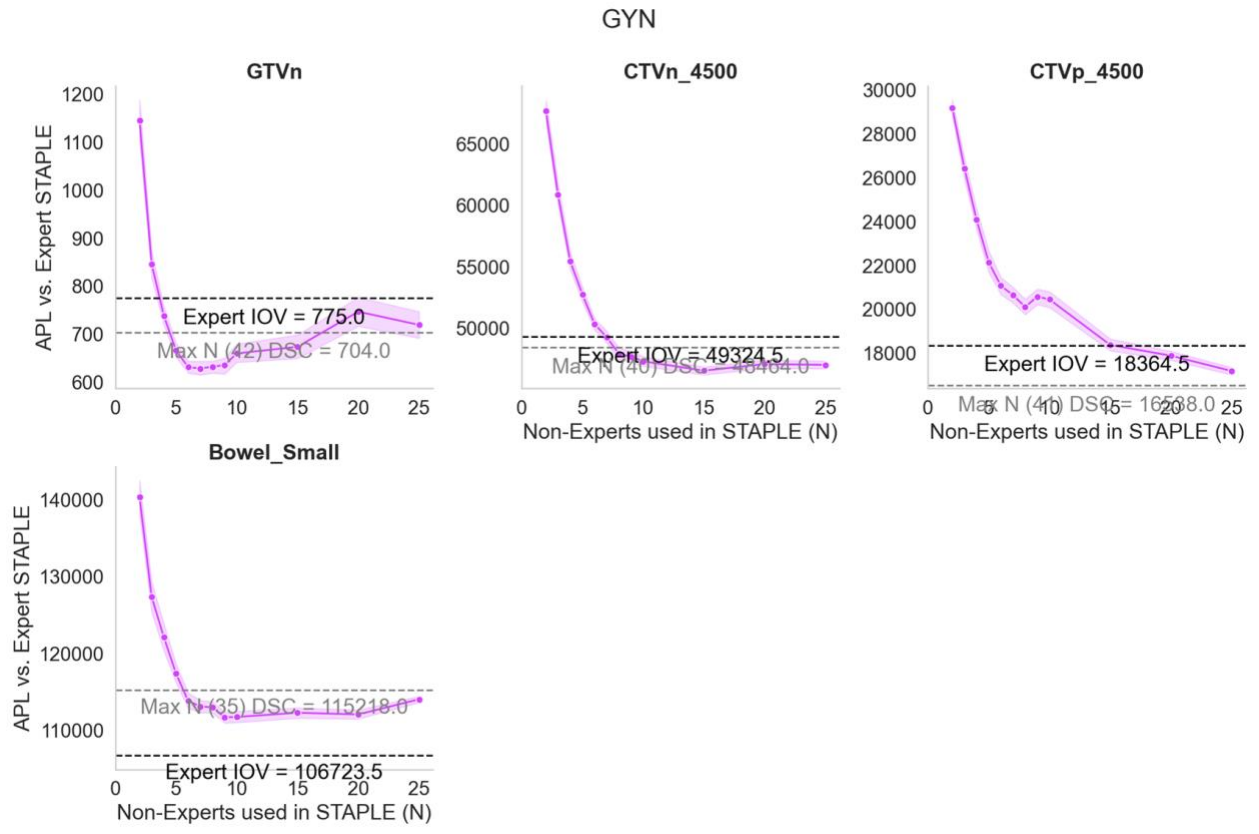

**Figure D14.** Bootstrap experiment results for GYN case using APL.

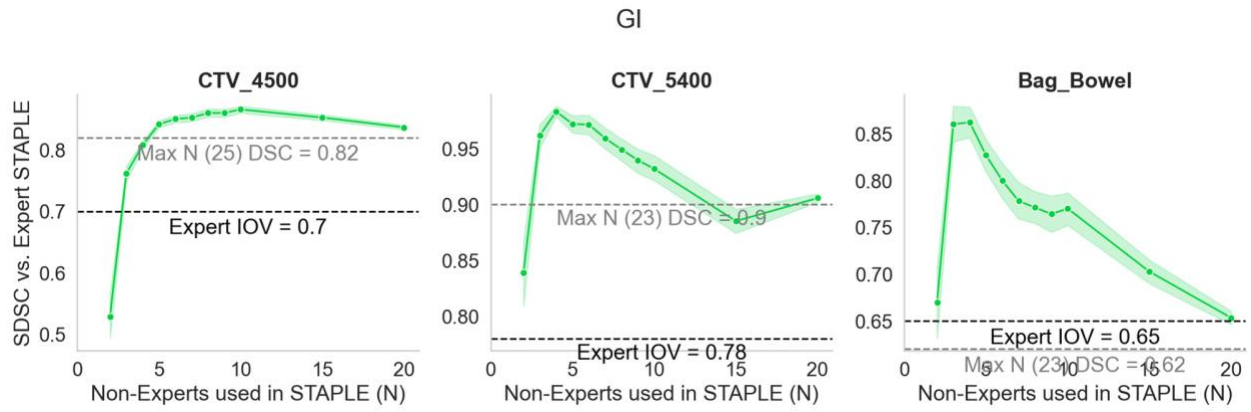

**Figure D15.** Bootstrap experiment results for GI case using SDSC.

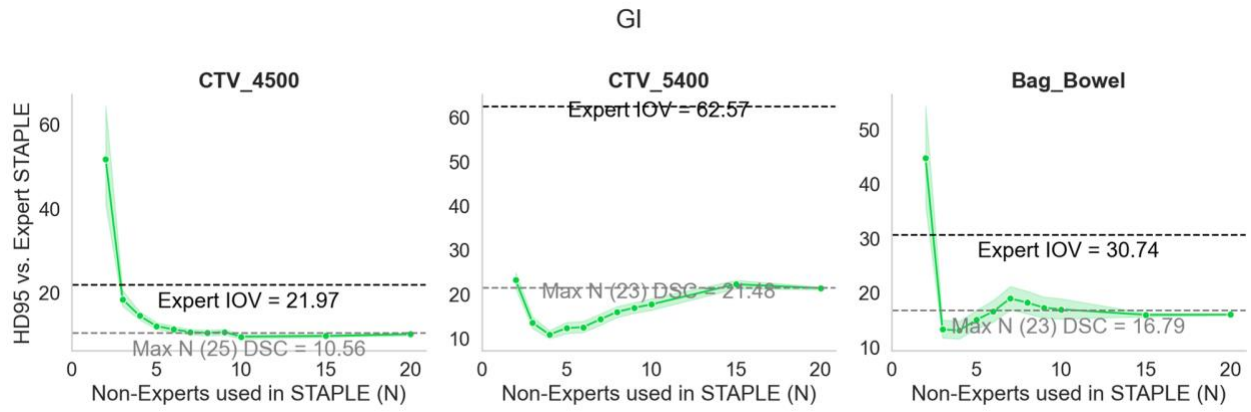

**Figure D16.** Bootstrap experiment results for GI case using HD95.

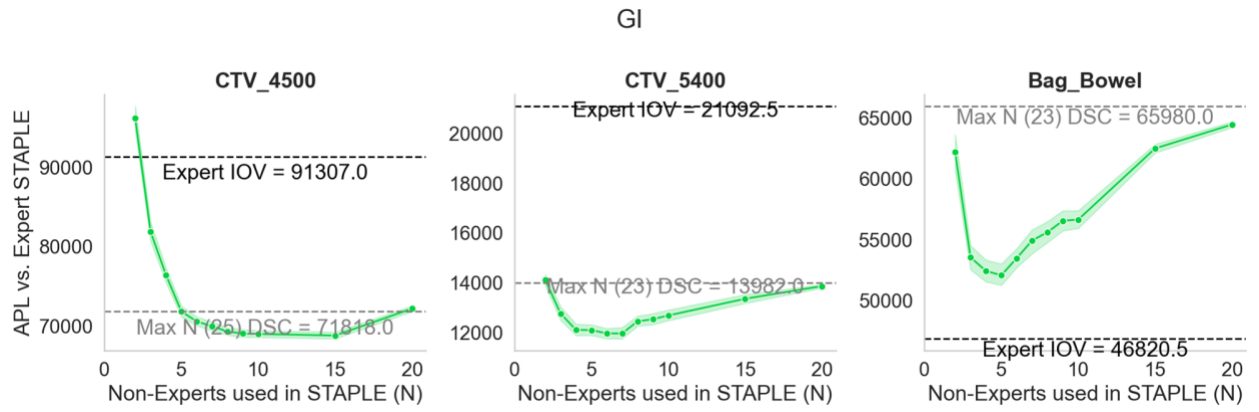

**Figure D17.** Bootstrap experiment results for GI case using APL.

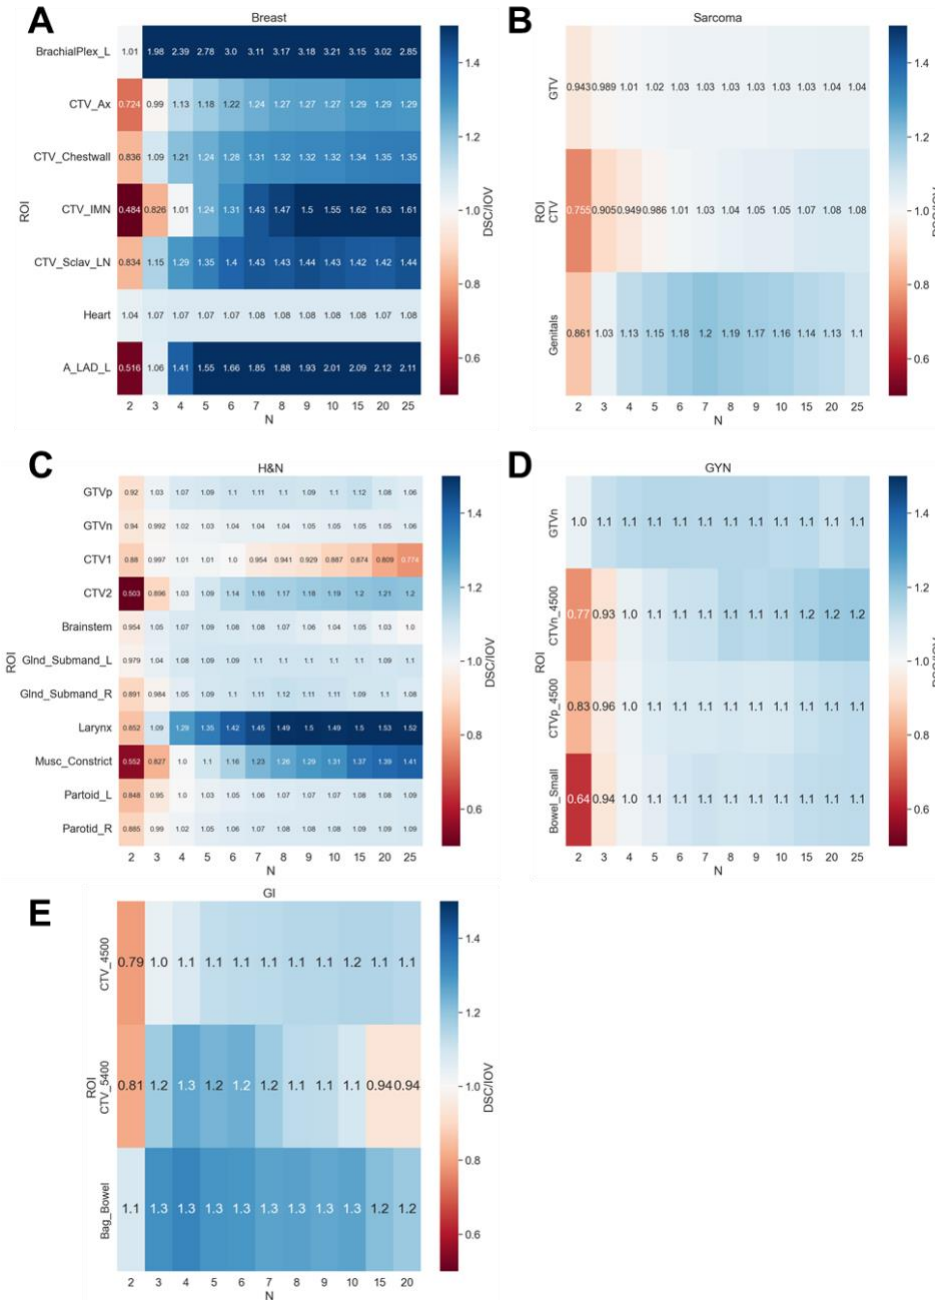

**Figure D18.** Heatmap of interobserver DSC ratio (median metric for non-expert STAPLE / median expert interobserver value) for variable number of non-expert observers used in STAPLE with respect to region of interest (ROI). The median DSC for the given non-expert subset was divided by the corresponding median expert interobserver value to yield a new measure of segmentation performance, referred to as the interobserver DSC ratio. If the interobserver DSC ratio is  $< 1$  it is considered not clinically acceptable, if the interobserver DSC ratio is  $\geq 1$  it is considered clinically acceptable. Breast, sarcoma, head and neck (H&N), gynecologic (GYN), and gastrointestinal (GI) cases are shown in (A), (B), (C), (D), and (E), respectively.
